# Supplementary material
Source: PubMed Central journal article supplement (PMC4809672)
Supplement: NIHMS767851-supplement-Suppl.pdf [file NIHMS767851-supplement-Suppl.pdf]

Supplementary Table: Definition of co-morbid illness in the cohort

| Co-morbid condition             | ICD-9 codes included                                                                                                                                                                                                                                                                                                                                                               |
|---------------------------------|------------------------------------------------------------------------------------------------------------------------------------------------------------------------------------------------------------------------------------------------------------------------------------------------------------------------------------------------------------------------------------|
| Cardiac co-morbidity            | V42.4, V43.3, V45.0, V53.3, 093.2, 394, 395, 396, 397, 397.1 398.91, 401, 401.x, 402.x, 403, 403.x, 404, 404.x, 405, 405.x, 410, 410.x, 412, 412.x, 413, 413.x, 414, 414.x, 415, 416, 416.x, 424, 425.4, 425.5, 425.7, 425.8, 425.9, 426.10, 426.11, 426.13, 426.2, 426.3, 426.4, 426.5, 426.6, 426.8, 427.0, 427.2, 427.31, 427.60, 427.9, 428, 428.x, 429, 785.0, 996.01, 996.04 |
| Psychiatric co-morbidity        | 295, 296, 297, 298, 299.1, 300.4, 301.12, 309, 311, 311.x                                                                                                                                                                                                                                                                                                                          |
| Renal failure                   | 403.11, 403.91, 404.12, 404.92, 585, 586, 588, V56                                                                                                                                                                                                                                                                                                                                 |
| Diabetes                        | 250.1, 250.2, 250.3, 648.0                                                                                                                                                                                                                                                                                                                                                         |
| Substance use                   | V11.3, V65.42, 291.1, 292, 292.2, 291.5, 291.6, 291.7, 291.8, 291.9, 303.0, 303.9, 304, 305, 305.3, 305.4, 305.5, 305.6, 305.7, 305.8, 305.9, 357.5, 425.5, 535.3, 571.0, 571.3, 571.2, 571.3, 648.3, 980                                                                                                                                                                          |
| Respiratory co-morbidity        | 490.xx, 505.xx, 416.8, 416.9, 506.4, 508.1, 508.8                                                                                                                                                                                                                                                                                                                                  |
| Human Immunodeficiency Syndrome | 042, 042.0, 042.1, 042.2, 042.9, 043.0, 043.1, 043.2, 043.3, 043.9, V08, 044.9, 079.53                                                                                                                                                                                                                                                                                             |
